# Supplementary material for: Efficacy of prophylactic cranial irradiation in patients with limited-disease small-cell lung cancer who were confirmed to have no brain metastasis via magnetic resonance imaging after initial chemoradiotherapy
Source: PubMed Central journal article supplement (PMC5915147; doi:10.18632/oncotarget.24830), 2018-04-03
Supplement: oncotarget-09-17664-s001.pdf [file oncotarget-09-17664-s001.pdf]

## Efficacy of prophylactic cranial irradiation in patients with limited-disease small-cell lung cancer who were confirmed to have no brain metastasis via magnetic resonance imaging after initial chemoradiotherapy

### SUPPLEMENTARY MATERIALS

**Supplementary Table 1: The associations between the patient characteristics and OS in the unmatched overall cohort (N = 80)**

| <b>Univariate analysis</b>                     | <b>HR</b> | <b>95% CI</b> | <b>p value</b> |
|------------------------------------------------|-----------|---------------|----------------|
| Age at diagnosis<br>≥75 versus <75             | 0.71      | (0.21–1.77)   | 0.498          |
| Gender<br>male versus female                   | 1.56      | (0.81–3.24)   | 0.191          |
| Performance status<br>0 versus 1–2             | 0.95      | (0.52–1.77)   | 0.869          |
| Smoking history<br>Current/former versus never | 0.48      | (0.145–2.93)  | 0.358          |
| Stage<br>II versus III                         | 0.68      | (0.26–1.50)   | 0.361          |
| Platinum-containing drug<br>CDDP versus CBDCA  | 1.30      | (0.59–3.43)   | 0.542          |
| TRT method<br>Concurrent versus sequential     | 1.34      | (0.58–3.91)   | 0.523          |
| Response to treatment<br>CR versus PR          | 0.65      | (0.33–1.23)   | 0.188          |
| PCI<br>with versus without                     | 1.26      | (0.63–2.79)   | 0.535          |
| <b>Multivariate analysis</b>                   | <b>HR</b> | <b>95% CI</b> | <b>p value</b> |
| Age at diagnosis<br>≥75 versus <75             | 0.86      | (0.18–4.10)   | 0.851          |
| Response to treatment<br>CR versus PR          | 0.62      | (0.31–1.20)   | 0.158          |
| TRT method<br>Concurrent versus sequential     | 1.00      | (0.28–4.33)   | 0.988          |
| PCI<br>with versus without                     | 1.29      | (0.53–3.84)   | 0.596          |

Abbreviations: OS, overall survival; HR, hazard ratio; CI, confidence interval; CDDP, cisplatin; CBDCA, carboplatin; TRT, thoracic radiotherapy; CR, complete response; PR, partial response; PCI, prophylactic cranial irradiation.
